# Supplementary material for: Predicting psoriasis using routine laboratory tests with random forest
Source: PubMed Central journal article supplement (PMC8525763; doi:10.1371/journal.pone.0258768), 2021-10-19
Supplement: pone.0258768.s001.pdf [file pone.0258768.s001.pdf]

## APPENDIX

**Table 1.** Feature List.

|    |                                                                   |    |                               |    |                                      |
|----|-------------------------------------------------------------------|----|-------------------------------|----|--------------------------------------|
| 1  | Gender                                                            | 28 | Platelet larger cell ratio    | 55 | Inorganic phosphate                  |
| 2  | Age                                                               | 29 | Alanine amiotransferase       | 56 | Serum magnesium                      |
| 3  | Systolic Blood Pressure                                           | 30 | Aspartate aminotransferase    | 57 | Anion gap                            |
| 4  | Diastolic Blood Pressure                                          | 31 | AST ALT ratio                 | 58 | Total cholesterol                    |
| 5  | White blood cell count                                            | 32 | Gamma-glutamyl transpeptadase | 59 | Triglyceride                         |
| 6  | Neutrophil ratio                                                  | 33 | Alkaline phosphatase          | 60 | High-density lipoprotein cholesterol |
| 7  | Lymphocyte ratio                                                  | 34 | Total biliary acid            | 61 | Low-density lipoprotein cholesterol  |
| 8  | Monocyte ratio                                                    | 35 | Pre albumin                   | 62 | Urine color                          |
| 9  | Eosinophil ratio                                                  | 36 | total protein                 | 63 | Turbidity                            |
| 10 | Basophil ratio                                                    | 37 | Albumin                       | 64 | Urine specific gravity               |
| 11 | Neutrophil count                                                  | 38 | Globulin                      | 65 | Urine potential of hydrogen          |
| 12 | Lymphocyte count                                                  | 39 | Albumin globulin ratio        | 66 | Urine leucocyte                      |
| 13 | Monocyte count                                                    | 40 | Total bilirubin               | 67 | Urine nitrite                        |
| 14 | Eosinophil count                                                  | 41 | Direct bilirubin              | 68 | Urine protein                        |
| 15 | Basophil count                                                    | 42 | Indirect bilirubin            | 69 | Urine glucose                        |
| 16 | Hemoglobin                                                        | 43 | Cholinesterase                | 70 | Urine ketone                         |
| 17 | Red blood cell count                                              | 44 | Cystatin-C                    | 71 | Urobilinogen                         |
| 18 | Hematocrit                                                        | 45 | Urea                          | 72 | Urine occult blood                   |
| 19 | Mean corpuscular volume                                           | 46 | Creatinine                    | 73 | Urine red blood cell                 |
| 20 | Mean corpuscular hemoglobin                                       | 47 | Urea/Crea ratio               | 74 | Urine leucocyte                      |
| 21 | Mean corpuscular hemoglobin concentration                         | 48 | Uric acid                     | 75 | Epithelial cell count                |
| 22 | Coefficient variation of red blood cell volume distribution width | 49 | Bicarbonate                   | 76 | Yeast-Like Cells                     |
| 23 | Standard deviation in red cell distribution width                 | 50 | Glucose                       | 77 | Urine crystallization                |
| 24 | Platelet count                                                    | 51 | Potassium ion                 | 78 | Red blood cell                       |
| 25 | Mean platelet volume                                              | 52 | Sodium ion                    | 79 | White blood cell                     |
| 26 | Platelet distribution width                                       | 53 | Chloride ion                  | 80 | Epithelial cells                     |
| 27 | Thrombocytocrit                                                   | 54 | Serum calcium                 | 81 | Cast                                 |

**Table 2.** Summarised biological and clinical information for the study population.

| (A) Continuous features                                                    | Psoriasis patients<br>(mean $\pm$ std. dev.) | Healthy controls<br>(mean $\pm$ std. dev.) |
|----------------------------------------------------------------------------|----------------------------------------------|--------------------------------------------|
| Age                                                                        | 39.17 $\pm$ 18.23                            | 42.10 $\pm$ 14.38                          |
| Systolic Blood Pressure                                                    | 120.24 $\pm$ 18.00                           | 123.46 $\pm$ 12.96                         |
| Diastolic Blood pressure                                                   | 79.35 $\pm$ 11.65                            | 79.42 $\pm$ 8.29                           |
| White blood cell count (WBC)                                               | 7.27 $\pm$ 3.21                              | 6.48 $\pm$ 1.34                            |
| Neutrophil ratio (NEUT%)                                                   | 58.55 $\pm$ 11.38                            | 58.59 $\pm$ 20.88                          |
| Lymphocyte ratio (LYMPH%)                                                  | 31.75 $\pm$ 10.68                            | 33.81 $\pm$ 7.35                           |
| Monocyte ratio (cytes%)                                                    | 6.60 $\pm$ 4.81                              | 5.70 $\pm$ 1.58                            |
| Eosinophil ratio (EO)                                                      | 2.89 $\pm$ 2.54                              | 2.31 $\pm$ 1.97                            |
| Basophil ratio (BASO%)                                                     | 0.27 $\pm$ 0.24                              | 0.33 $\pm$ 0.45                            |
| Neutrophil count (NEUT#)                                                   | 4.46 $\pm$ 3.01                              | 3.81 $\pm$ 1.60                            |
| Lymphocyte count (LYMPH#)                                                  | 2.63 $\pm$ 10.32                             | 2.16 $\pm$ 0.57                            |
| Monocyte count (MONO#)                                                     | 0.45 $\pm$ 0.21                              | 0.37 $\pm$ 0.19                            |
| Eosinophil count (EO#)                                                     | 0.20 $\pm$ 0.18                              | 0.15 $\pm$ 0.15                            |
| Basophil count (BASO#)                                                     | 0.02 $\pm$ 0.05                              | 0.02 $\pm$ 0.06                            |
| Hemoglobin (HGB)                                                           | 137.62 $\pm$ 17.03                           | 143.24 $\pm$ 13.88                         |
| Red blood cell count (RBC)                                                 | 4.58 $\pm$ 2.22                              | 4.73 $\pm$ 0.52                            |
| Hematocrit (HCT)                                                           | 41.21 $\pm$ 4.73                             | 42.92 $\pm$ 4.93                           |
| Mean corpuscular volume (MCV)                                              | 91.97 $\pm$ 6.25                             | 109.43 $\pm$ 418.97                        |
| Mean corpuscular hemoglobin (MCH)                                          | 30.74 $\pm$ 2.05                             | 30.20 $\pm$ 2.30                           |
| Mean corpuscular hemoglobin concentration (MCHC)                           | 332.28 $\pm$ 22.91                           | 333.09 $\pm$ 16.30                         |
| Coefficient variation of red blood cell volume distribution width (RDW-CV) | 13.21 $\pm$ 1.26                             | 12.97 $\pm$ 1.09                           |
| Standard deviation in red cell distribution width (RDW-SD)                 | 44.23 $\pm$ 5.10                             | 42.91 $\pm$ 2.70                           |
| Platelet count (PLT)                                                       | 245.86 $\pm$ 78.01                           | 236.22 $\pm$ 51.94                         |
| Mean platelet volume (MPV)                                                 | 10.91 $\pm$ 4.52                             | 9.92 $\pm$ 1.69                            |
| Platelet distribution width (PDW)                                          | 13.08 $\pm$ 5.79                             | 14.15 $\pm$ 2.43                           |
| Thrombocytocrit (PCT)                                                      | 0.26 $\pm$ 0.08                              | 0.36 $\pm$ 1.96                            |
| Platelet larger cell ratio (P-LCR)                                         | 30.92 $\pm$ 8.15                             | 31.76 $\pm$ 7.92                           |
| Alanine aminotransferase (ALT)                                             | 21.62 $\pm$ 21.25                            | 18.31 $\pm$ 9.15                           |
| Aspartate aminotransferase (AST)                                           | 20.48 $\pm$ 10.89                            | 18.28 $\pm$ 4.79                           |
| AST/ALT                                                                    | 1.21 $\pm$ 0.67                              | 1.37 $\pm$ 4.15                            |
| $\gamma$ -glutamyl transpeptidase (GGT)                                    | 33.00 $\pm$ 43.56                            | 24.08 $\pm$ 20.69                          |
| Alkaline phosphatase (ALP)                                                 | 85.89 $\pm$ 45.55                            | 70.05 $\pm$ 23.22                          |
| Total biliary acid (TBA)                                                   | 4.67 $\pm$ 6.12                              | 3.70 $\pm$ 5.34                            |
| Pre albumin (PA)                                                           | 229.35 $\pm$ 76.55                           | 282.41 $\pm$ 63.87                         |
| Total protein (TP)                                                         | 67.93 $\pm$ 6.05                             | 71.79 $\pm$ 5.35                           |
| Albumin (ALB)                                                              | 41.97 $\pm$ 5.03                             | 45.00 $\pm$ 3.93                           |
| Globulin (GLO)                                                             | 26.35 $\pm$ 9.39                             | 26.71 $\pm$ 4.14                           |
| Albumin/Globulin                                                           | 1.68 $\pm$ 0.33                              | 1.76 $\pm$ 0.72                            |
| Total bilirubin (TBIL)                                                     | 10.69 $\pm$ 7.09                             | 11.46 $\pm$ 5.57                           |
| Direct bilirubin (DBIL)                                                    | 4.20 $\pm$ 3.36                              | 4.14 $\pm$ 1.40                            |
| Indirect bilirubin (IDBIL)                                                 | 6.37 $\pm$ 4.36                              | 7.32 $\pm$ 4.35                            |
| Cholinesterase (CHE)                                                       | 7885.17 $\pm$ 2048.02                        | 8737.74 $\pm$ 1742.42                      |
| Cystatin-C                                                                 | 0.72 $\pm$ 0.30                              | 0.74 $\pm$ 3.10                            |
| Urea                                                                       | 4.56 $\pm$ 1.58                              | 5.06 $\pm$ 1.40                            |
| Creatinine                                                                 | 66.43 $\pm$ 25.36                            | 66.55 $\pm$ 15.13                          |
| Urea/Crea                                                                  | 87.34 $\pm$ 323.26                           | 77.59 $\pm$ 24.27                          |
| Uric acid (UA)                                                             | 315.44 $\pm$ 138.35                          | 313.93 $\pm$ 84.59                         |
| Bicarbonate (HCO3)                                                         | 26.93 $\pm$ 14.65                            | 26.51 $\pm$ 2.15                           |

|                                              |                |               |
|----------------------------------------------|----------------|---------------|
| Glucose                                      | 6.77 ± 29.15   | 5.31 ± 2.06   |
| Potassium ion                                | 5.68 ± 20.91   | 4.32 ± 0.39   |
| Sodium ion (Na)                              | 141.28 ± 3.57  | 141.37 ± 2.01 |
| Chloride ion (Cl)                            | 105.05 ± 7.61  | 104.41 ± 5.63 |
| Serum calcium (Ca)                           | 2.82 ± 10.99   | 2.29 ± 0.12   |
| Inorganic phosphate (P)                      | 1.26 ± 0.56    | 1.37 ± 5.24   |
| Serum magnesium (Mg)                         | 0.98 ± 0.94    | 1.35 ± 6.39   |
| Anion gap (AG)                               | 14.37 ± 6.09   | 18.43 ± 71.76 |
| Total cholesterol (T-CH)                     | 5.31 ± 22.84   | 6.09 ± 29.98  |
| Triglyceride                                 | 1.54 ± 1.05    | 1.31 ± 0.90   |
| High-density lipoprotein cholesterol (HDL-C) | 1.23 ± 0.37    | 1.41 ± 0.31   |
| low-density lipoprotein cholesterol (LDL-C)  | 2.68 ± 0.76    | 2.80 ± 1.21   |
| Urine specific gravity (SG)                  | 1.02 ± 0.01    | 3.17 ± 46.39  |
| Urine potential of hydrogen (U-PH)           | 6.02 ± 0.78    | 6.23 ± 2.33   |
| Urine red blood cell (RBC)                   | 31.14 ± 265.26 | 9.94 ± 41.60  |
| Urine leucocyte (WBC)                        | 29.21 ± 137.49 | 9.30 ± 33.06  |
| Epithelial cell count (EC)                   | 6.60 ± 15.09   | 5.78 ± 12.20  |
| Red blood cell (RBCH)                        | 2.84 ± 13.39   | 1.72 ± 7.46   |
| White blood cell (WBCH)                      | 2.62 ± 8.41    | 1.59 ± 5.98   |
| Epithelial cells (ECH)                       | 1.06 ± 2.54    | 0.96 ± 2.25   |
| Cast (CASTL)                                 | 0.00 ± 0.00    | 0.08 ± 0.82   |

| (B) Categorical features | Psoriasis patients (value: frequency)                                | Healthy controls (value: frequency)                         |
|--------------------------|----------------------------------------------------------------------|-------------------------------------------------------------|
| Gender                   | Male: 273<br>Female: 193                                             | Male: 265<br>Female: 255                                    |
| Urine color              | Yellow: 297<br>Faint yellow: 108<br>Clear: 53<br>NA: 8               | Yellow: 420<br>Faint yellow: 45<br>Clear: 37<br>NA: 18      |
| Turbidity                | Turbidity: 46<br>Low turbidity: 150<br>Clear: 262<br>NA: 8           | Turbidity: 28<br>Low turbidity: 153<br>Clear: 321<br>NA: 18 |
| Urine leucocyte          | Negative: 375<br>+ -: 18<br>1: 25<br>2: 22<br>3: 14<br>4: 6<br>NA: 6 | Negative: 448<br>+ -: 19<br>1: 5<br>2: 10<br>3: 5<br>NA: 17 |
| Urine nitrite            | Negative: 450<br>1: 3<br>2: 7<br>NA: 6                               | Negative: 503<br>2: 1<br>NA: 16                             |
| Urine protein            | Negative: 345<br>+ -: 82<br>1: 28<br>2: 2<br>3: 3<br>NA: 6           | Negative: 421<br>+ -: 67<br>1: 13<br>2: 1<br>NA: 18         |
| Urine glucose            | Normal: 440<br>+ -: 6                                                | Normal: 490<br>+ -: 4                                       |

|                       |                                                            |                                                             |
|-----------------------|------------------------------------------------------------|-------------------------------------------------------------|
|                       | 1: 2<br>3: 4<br>4: 8<br>NA: 6                              | 1: 2<br>2: 1<br>3: 4<br>4: 3<br>NA: 16                      |
| Urine ketone          | Negative: 441<br>+ -: 10<br>1: 7<br>2: 1<br>3: 1<br>NA: 6  | Negative: 494<br>+ -: 6<br>1: 1<br>NA: 6                    |
| Urbilinogen           | Normal: 406<br>+ -: 1<br>1: 46<br>2: 6<br>3: 1<br>NA: 6    | Normal: 477<br>1: 21<br>2: 1<br>NA: 16                      |
| Urine blood           | Negative: 430<br>+ -: 12<br>1: 10<br>2: 4<br>3: 4<br>NA: 6 | Negative: 443<br>+ -: 26<br>1: 23<br>2: 1<br>3: 3<br>NA: 17 |
| Yeast-Like Cells      | Negative: 460<br>NA: 6                                     | Negative: 500<br>Positive: 4<br>NA: 16                      |
| Urine crystallization | Negative: 454<br>Positive: 6<br>NA: 6                      | Negative: 478<br>Positive: 26<br>NA: 16                     |
